# Supplementary material for: Prognostic Significance of KIF11 and KIF14 Expression in Pancreatic Adenocarcinoma
Source: MDPI journal article supplement (doi:10.3390/cancers13123017), 2021-06-16
Supplement: s1 [file s1]

Table S1. Descriptive statistics for KIF11 and KIF14 expression parameters.

| Variable  | TUMOR |        |     |     |      |      | ADJACENT |     |     |     |      |      |
|-----------|-------|--------|-----|-----|------|------|----------|-----|-----|-----|------|------|
|           | MED   | IQR    | MIN | MAX | Mean | SD   | MED      | IQR | MIN | MAX | Mean | SD   |
| KIF11 IS  | 2     | 1-2    | 0   | 3   | 1.58 | 0.86 | 1        | 0-1 | 0   | 2   | 0.59 | 0.53 |
| KIF11 PS  | 1     | 0-1.46 | 0   | 3   | 0.88 | 0.82 | 3        | 0-4 | 0   | 4   | 2.03 | 1.85 |
| KIF11 IRS | 1     | 0-2.23 | 0   | 9   | 1.54 | 1.82 | 3        | 0-4 | 0   | 4   | 2.06 | 1.87 |
| KIF14 IS  | 1.5   | 1-2    | 0   | 3   | 1.70 | 0.70 | 1        | 1-1 | 0   | 2   | 0.98 | 0.40 |
| KIF14 PS  | 4     | 3-4    | 0   | 4   | 3.40 | 0.85 | 4        | 4-4 | 0   | 4   | 3.42 | 1.26 |
| KIF14 IRS | 6     | 4-8    | 0   | 12  | 6.03 | 2.90 | 4        | 4-4 | 0   | 8   | 3.68 | 1.64 |

IS – immunointensity; PS - immunopercentage; IRS – immunoreactive score (IS x PS); med – median; IQR- interquartile range; min- minimum; max – maximum; SD – standard deviation.

Table S2. Univariate and multivariate Cox proportional hazards models for overall survival of TCGA patients with pancreatic adenocarcinoma.

| Variable                    | Univariate analysis |        |       |                   | Multivariate analysis:<br>KIF11+KIF14* |        |       |               | Multivariate analysis:<br>5-gene panel** |        |       |                   |
|-----------------------------|---------------------|--------|-------|-------------------|----------------------------------------|--------|-------|---------------|------------------------------------------|--------|-------|-------------------|
|                             | HR                  | 95% CI |       | P                 | HR                                     | 95% CI |       | P             | HR                                       | 95% CI |       | P                 |
|                             |                     | lower  | upper |                   |                                        | lower  | upper |               |                                          | lower  | upper |                   |
| <i>KIF11+KIF14*</i>         | 3.41                | 2.12   | 5.47  | <b>&lt;0.0001</b> | 2.60                                   | 1.58   | 4.29  | <b>0.0002</b> | -                                        | -      | -     | -                 |
| 5-gene panel**              | 5.18                | 2.63   | 10.20 | <b>&lt;0.0001</b> | -                                      | -      | -     | -             | 5.21                                     | 2.41   | 11.27 | <b>&lt;0.0001</b> |
| <i>ASPM</i> (low vs. high)  | 2.61                | 1.73   | 3.94  | <b>&lt;0.0001</b> | -                                      | -      | -     | -             | -                                        | -      | -     | -                 |
| <i>CEP55</i> (low vs. high) | 2.49                | 1.58   | 3.90  | <b>&lt;0.0001</b> | -                                      | -      | -     | -             | -                                        | -      | -     | -                 |
| <i>GAMT</i> (high vs. low)  | 0.61                | 0.39   | 0.94  | <b>0.03</b>       | -                                      | -      | -     | -             | -                                        | -      | -     | -                 |
| Age (≤ 60 vs. ≥ 60)         | 1.41                | 0.90   | 2.21  | 0.13              | 1.46                                   | 0.85   | 2.50  | 0.17          | 2.68                                     | 1.20   | 5.97  | <b>0.02</b>       |
| Sex (female vs. male)       | 0.81                | 0.54   | 1.23  | 0.33              | 0.92                                   | 0.56   | 1.49  | 0.72          | 1.00                                     | 0.50   | 2.05  | 0.99              |
| Grade (G1 vs. G2-G3)        | 2.18                | 1.15   | 4.13  | <b>0.02</b>       | 1.68                                   | 0.67   | 4.19  | 0.27          | 1.20                                     | 0.39   | 3.67  | 0.75              |
| pN (absent vs. present)     | 2.10                | 1.25   | 3.52  | <b>0.005</b>      | 2.45                                   | 1.28   | 4.69  | <b>0.01</b>   | 4.37                                     | 1.49   | 12.80 | <b>0.01</b>       |
| pT (T1-T2 vs. T3-T4)        | 2.21                | 1.14   | 4.28  | <b>0.02</b>       | 1.08                                   | 0.50   | 2.36  | 0.84          | 1.79                                     | 0.39   | 8.14  | 0.45              |

Significant p-values (p < 0.05) are marked in bold.

\*n = 133; KIF11<sup>low</sup>/KIF14<sup>low</sup> vs. KIF11<sup>high</sup>/KIF14<sup>high</sup>

\*\*n = 85; KIF11<sup>low</sup>/KIF14<sup>low</sup>/CEP55<sup>low</sup>/ASPM<sup>low</sup>/GAMT<sup>high</sup> vs. KIF11<sup>high</sup>/KIF14<sup>high</sup>/CEP55<sup>high</sup>/ASPM<sup>high</sup>/GAMT<sup>low</sup>

Abbreviations: CI, confidence interval; HR, hazard ratio; OS – overall survival; TCGA – The Cancer Genome Atlas. HR: adjusting for age, gender, histologic grade, pN, pT, and each marker separately. Owing to the strong correlations between *KIF11* and *KIF14* mRNA expression, they were not included in the same multivariate model.

‘-’ indicates variable was not included in multivariate Cox analysis.
